# Supplementary material for: Characterization of Calpain and Caspase-6-Generated Glial Fibrillary Acidic Protein Breakdown Products Following Traumatic Brain Injury and Astroglial Cell Injury
Source: MDPI journal article supplement (doi:10.3390/ijms23168960), 2022-08-11
Supplement: s1 [file s1]

## IJMS Ms Supplementary Materials Yang et al.

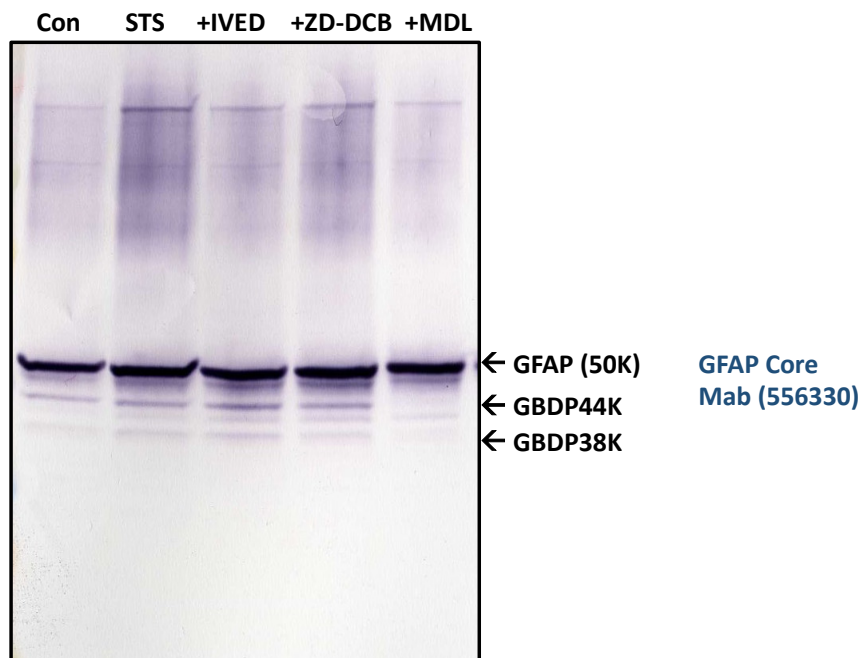

**Figure S1. Effects of caspase-6 and calpain inhibitor on GBDP-38K production in rat cerebrocortical culture after STS treatment.** Data shown is representative of N=3. STS; staurosporine (1  $\mu$ M for 24 h) in the presence or absence of calpain inhibitor MDL-28170 (50  $\mu$ M), caspase-6 inhibitor Z-IVED-FMK (50  $\mu$ M) or pan-caspase inhibitor Z-D-DCB. STS generated GBDP38K was not blocked by Z-IVED-FMK or Z-d-DCB, but by MDL28170.

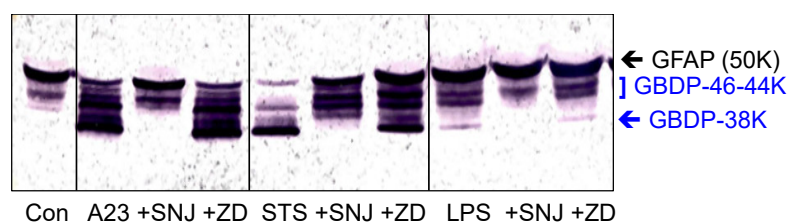

**Figure S2. GFAP proteolysis in rat primary glial culture after cytotxin-challenges as well as LPS (200 ng/mL) stimulation for 24 h.** Data shown is representative of N=3. A232: A23187, STS; staurosporine, SNJ; calpain inhibitor SNJ1945, Z\_D- pan caspase inhibitor Z-D-DCB

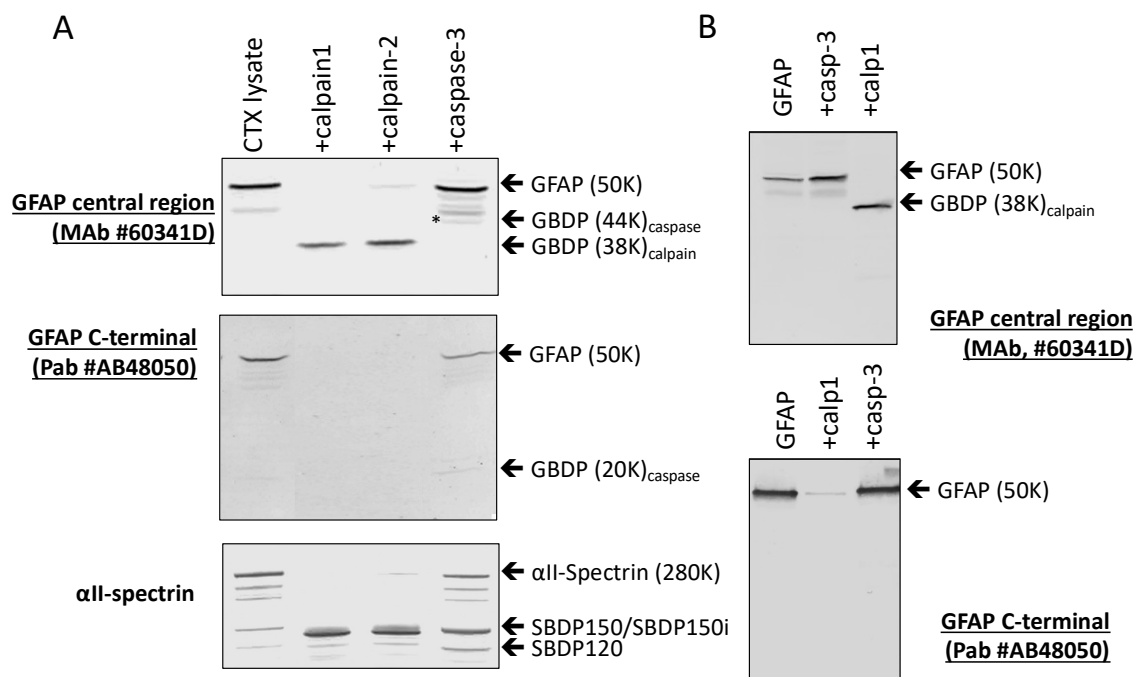

**Figure S3. GFAP is relatively resistant to caspase-3 digestion. (A) GFAP from cortical mixed culture lysate is relatively resistant to in vitro digestion by caspase-3 generating only minor appearance of 44K and 20K fragments. (B) Purified recombinant GFAP is also resistant to caspase-3 digestion.**

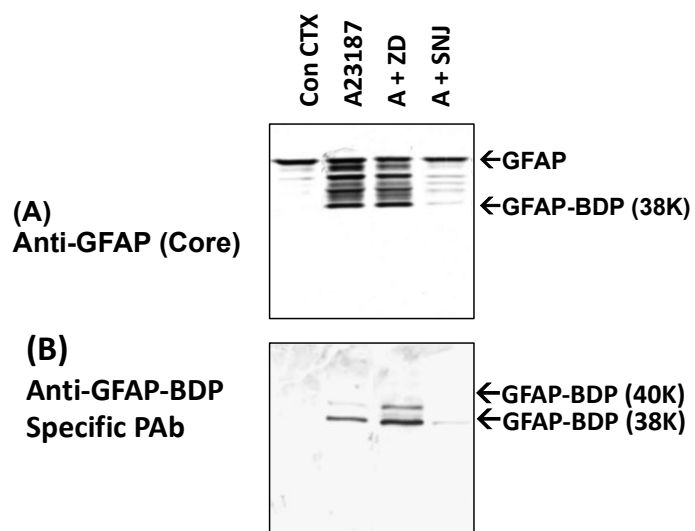

**Figure S4.** Full length human GFAP digestion by calpain generated several C-terminal LMW peptides. GBDP-specific antibody detected GFAP-fragments of 40k, 38K were specifically sensitive to calpain inhibitor SNJ-1945, but not sensitive to pan caspase inhibitor Z-D-DCB. (A) anti-GFAP-Core Ab, (B) GBDP-N-term PAb.

**Table S1. Severe TBI patient demographic data.**

|                                                      |                               |                |
|------------------------------------------------------|-------------------------------|----------------|
| <b>Number</b>                                        |                               | <b>21</b>      |
| <b>Age, mean +/- SD</b>                              |                               | <b>32+/-10</b> |
| <b>Gender, n</b>                                     | <b>Male</b>                   | <b>17</b>      |
|                                                      | <b>female</b>                 | <b>4</b>       |
| <b>Motor Glasgow Coma Score, median/range</b>        |                               | <b>4/1-6</b>   |
| <b>Pupils, n</b>                                     | <b>Both reactive</b>          | <b>13</b>      |
|                                                      | <b>One reactive</b>           | <b>1</b>       |
|                                                      | <b>Neither reactive</b>       | <b>7</b>       |
| <b>Marshall CT category, n</b>                       | <b>Diffuse injury 1</b>       | <b>0</b>       |
|                                                      | <b>Diffuse injury 2</b>       | <b>5</b>       |
|                                                      | <b>Diffuse injury 3</b>       | <b>5</b>       |
|                                                      | <b>Diffuse injury 4</b>       | <b>3</b>       |
|                                                      | <b>Evacuated mas</b>          | <b>8</b>       |
|                                                      | <b>Unevacuated mas</b>        | <b>0</b>       |
| <b>Mechanism of Injury</b>                           | <b>Motor vehicle accident</b> | <b>13</b>      |
|                                                      | <b>Fall</b>                   | <b>1</b>       |
|                                                      | <b>Assault</b>                | <b>6</b>       |
|                                                      | <b>Other</b>                  | <b>1</b>       |
| <b>6 month Glasgow Outcome Scale, n</b>              | <b>Good recovery</b>          | <b>1</b>       |
|                                                      | <b>Moderate disability</b>    | <b>6</b>       |
|                                                      | <b>Severe disability</b>      | <b>8</b>       |
|                                                      | <b>Vegetative</b>             | <b>1</b>       |
|                                                      | <b>Dea</b>                    | <b>3</b>       |
|                                                      | <b>Lost to follow up</b>      | <b>2</b>       |
| <b>6 Month Disability Rating Scale, median/range</b> |                               | <b>6/0-30</b>  |

Table S2. GFAP peptides LC-selected reaction monitoring (SRM)- MS/MS parameters

| Compound                | Start time<br>(min) | End time<br>(min) | Precursor<br>(m/z) | Product<br>(m/z) | Collision<br>energy | Min Dwell<br>time (ms) |
|-------------------------|---------------------|-------------------|--------------------|------------------|---------------------|------------------------|
| DGEVIKE (+2)            | 0                   | 50                | 395.203            | 276.155          | 17.8                | 9.957                  |
| DGEVIKE (+2)            | 0                   | 50                | 395.203            | 389.239          | 11.8                | 9.957                  |
| DGEVIKE (+2)            | 0                   | 50                | 395.203            | 488.308          | 13.8                | 9.957                  |
| DGEVIKE (+2)            | 0                   | 50                | 395.203            | 617.35           | 11.8                | 9.957                  |
| DGEVIKE (+2)            | 0                   | 50                | 395.203            | 674.372          | 15.8                | 9.957                  |
| DGEVIKE (heavy)<br>(+2) | 0                   | 50                | 398.209            | 276.155          | 17.8                | 9.957                  |
| DGEVIKE (heavy)<br>(+2) | 0                   | 50                | 398.209            | 389.239          | 11.8                | 9.957                  |
| DGEVIKE (heavy)<br>(+2) | 0                   | 50                | 398.209            | 494.322          | 13.8                | 9.957                  |
| DGEVIKE (heavy)<br>(+2) | 0                   | 50                | 398.209            | 623.364          | 11.8                | 9.957                  |
| DGEVIKE (heavy)<br>(+2) | 0                   | 50                | 398.209            | 680.386          | 15.8                | 9.957                  |
| DGEVIKES (+2)           | 0                   | 50                | 438.719            | 235.092          | 13.2                | 9.957                  |
| DGEVIKES (+2)           | 0                   | 50                | 438.719            | 363.187          | 15.2                | 9.957                  |
| DGEVIKES (+2)           | 0                   | 50                | 438.719            | 476.271          | 13.2                | 9.957                  |
| DGEVIKES (+2)           | 0                   | 50                | 438.719            | 575.34           | 13.2                | 9.957                  |
| DGEVIKES (+2)           | 0                   | 50                | 438.719            | 704.382          | 13.2                | 9.957                  |
| DGEVIKESb(+2)           | 0                   | 50                | 438.719            | 761.404          | 15.2                | 9.957                  |
| DGEVIKES<br>(heavy)(+2) | 0                   | 50                | 441.725            | 235.092          | 13.2                | 9.957                  |
| DGEVIKES<br>(heavy)(+2) | 0                   | 50                | 441.725            | 363.187          | 15.2                | 9.957                  |
| DGEVIKES<br>(heavy)(+2) | 0                   | 50                | 441.725            | 476.271          | 13.2                | 9.957                  |
| DGEVIKES<br>(heavy)(+2) | 0                   | 50                | 441.725            | 581.354          | 13.2                | 9.957                  |
| DGEVIKES<br>(heavy)(+2) | 0                   | 50                | 441.725            | 710.396          | 13.2                | 9.957                  |
| DGEVIKES<br>(heavy)(+2) | 0                   | 50                | 441.725            | 767.418          | 15.2                | 9.957                  |
